# Supplementary material for: Safety of Repeated Administration of Xenogeneic Human Apoptotic State (Allocetra-OTS) in Sprague Dawley Rats
Source: MDPI journal article supplement (doi:10.3390/pharmaceutics16030426), 2024-03-20
Supplement: s1 [file s1]

## **Supplementary Figures and Tables**

**Safety of repeated administration of xenogeneic human apoptotic state (Allocetra-OTS)  
in Sprague Dawley rats**

**Figure S1: Average Allocetra-OTS concentration vs. time data following IV administration, linear scale**

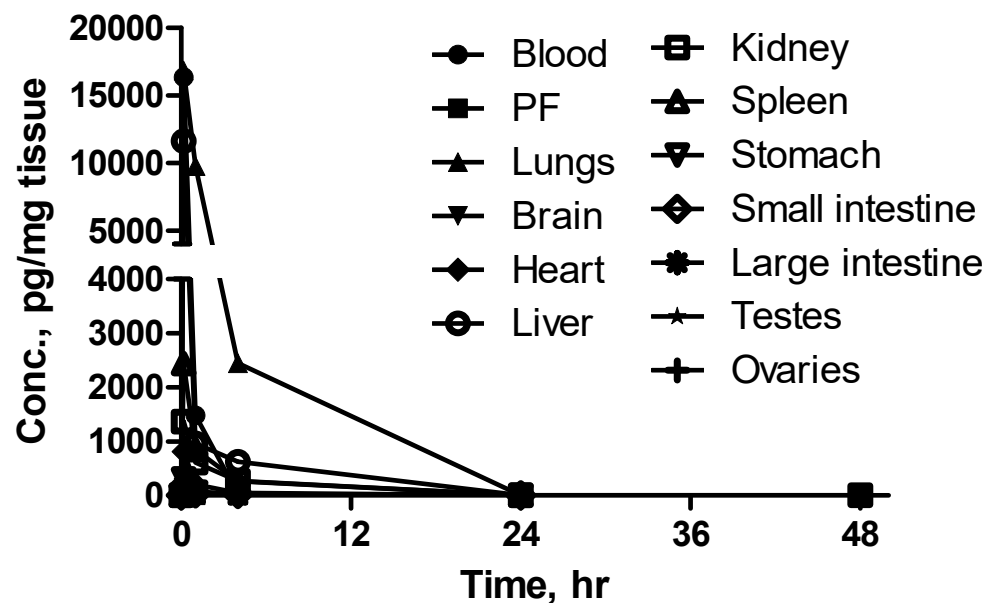

## FIGURE LEGENDS

**Figure S1. Average Allocetra-OTS concentration vs. time data following IV administration, linear scale.** Biodistribution GLP-study results following single IV administration of Allocetra-OTS to ICR mice. The concentration of Allocetra-OTS in different mouse organs, tissues and body fluids was quantified using a highly sensitive quantitative polymerase chain reaction (qPCR) method based on the quantification of human unique Alu sequences. The analysis results are reported as the relative human to mouse DNA concentration

**Table S1: Hematology analysis, Male, Main Study**

| Group                                      | Normal Range | Vehicle (1M) |       |    | Allocetra-OTS 140x10 <sup>6</sup> cells/kg (2M) |       |    | Allocetra-OTS 700x10 <sup>6</sup> cells/kg (3M) |       |    | Allocetra-OTS 1260x10 <sup>6</sup> cells/kg (4M) |       |    |
|--------------------------------------------|--------------|--------------|-------|----|-------------------------------------------------|-------|----|-------------------------------------------------|-------|----|--------------------------------------------------|-------|----|
|                                            |              | AVG          | SEM   | N  | AVG                                             | SEM   | N  | AVG                                             | SEM   | N  | AVG                                              | SEM   | N  |
| WBC (10 <sup>3</sup> /μL)                  | 6.4-18.8     | 6.48         | 0.32  | 10 | 8.06**                                          | 0.42  | 10 | 10.14***                                        | 0.66  | 10 | 11.63***                                         | 0.54  | 10 |
| RBC (10 <sup>6</sup> /μL)                  | 7.8-9.38     | 7.40         | 0.11  | 10 | 7.28                                            | 0.13  | 10 | 7.17                                            | 0.08  | 10 | 7.31                                             | 0.06  | 10 |
| HGB (g/dL)                                 | 14.6-16.8    | 14.26        | 0.15  | 10 | 14.37                                           | 0.21  | 10 | 14.15                                           | 0.13  | 10 | 14.47                                            | 0.11  | 10 |
| Hematocrit (%)                             | 45.4-54.1    | 46.78        | 0.58  | 10 | 46.97                                           | 0.81  | 10 | 45.75                                           | 0.42  | 10 | 47.04                                            | 0.53  | 10 |
| MCV (fL)                                   | 53.3-62.4    | 63.24        | 0.61  | 10 | 64.56                                           | 0.61  | 10 | 63.83                                           | 0.71  | 10 | 64.33                                            | 0.55  | 10 |
| MCH (pg)                                   | 17-19.6      | 19.29        | 0.23  | 10 | 19.78                                           | 0.18  | 10 | 19.74                                           | 0.19  | 10 | 19.80                                            | 0.16  | 10 |
| MCHC (g/dL)                                | 29.6-33.6    | 30.53        | 0.18  | 10 | 30.63                                           | 0.18  | 10 | 30.93                                           | 0.18  | 10 | 30.80                                            | 0.22  | 10 |
| Neutrophils (%)                            | 5.0-31.0     | 18.85        | 1.90  | 10 | 13.93*                                          | 1.25  | 10 | 13.31*                                          | 0.71  | 10 | 20.85                                            | 2.67  | 10 |
| Bands (%)                                  | NA           | 0.00         | 0.00  | 10 | 0.00                                            | 0.00  | 10 | 0.00                                            | 0.00  | 10 | 0.00                                             | 0.00  | 10 |
| Lymphocytes (%)                            | 59-93        | 76.63        | 1.89  | 10 | 80.26                                           | 1.48  | 10 | 80.11                                           | 1.16  | 10 | 73.61                                            | 2.73  | 10 |
| Monocytes (%)                              | 0-6          | 2.00         | 0.13  | 10 | 1.87                                            | 0.15  | 10 | 2.31                                            | 0.22  | 10 | 2.49*                                            | 0.12  | 10 |
| Eosinophils (%)                            | 0-4          | 1.40         | 0.19  | 10 | 2.01                                            | 0.38  | 10 | 2.30                                            | 0.69  | 10 | 1.08                                             | 0.11  | 10 |
| Basophils (%)                              | 0-2          | 0.12         | 0.01  | 10 | 0.29***                                         | 0.03  | 10 | 0.31***                                         | 0.02  | 10 | 0.30***                                          | 0.03  | 10 |
| Platelets (10 <sup>3</sup> /μL)            | 453-1081     | 722.20       | 67.15 | 10 | 835.70                                          | 24.34 | 10 | 795.30                                          | 51.60 | 10 | 762.00                                           | 63.97 | 10 |
| Retic (%)                                  | NA           | 3.556        | 0.18  | 10 | 2.98*                                           | 0.17  | 10 | 3.15                                            | 0.17  | 10 | 2.28**                                           | 0.30  | 10 |
| MPV (fL)                                   | NA           | 9.64         | 0.38  | 10 | 8.93                                            | 0.20  | 10 | 9.46                                            | 0.22  | 10 | 9.96                                             | 0.65  | 10 |
| RDW (%)                                    | NA           | 12.01        | 0.14  | 10 | 11.57*                                          | 0.11  | 10 | 11.59*                                          | 0.11  | 10 | 12.52                                            | 1.19  | 10 |
| Neutrophils Absolute (10 <sup>3</sup> /μL) | NA           | 1.23         | 0.15  | 10 | 1.13                                            | 0.13  | 10 | 1.33                                            | 0.08  | 10 | 2.44**                                           | 0.34  | 10 |
| Bands Absolute (10 <sup>3</sup> /μL)       | NA           | 0.00         | 0.00  | 10 | 0.00                                            | 0.00  | 10 | 0.00                                            | 0.00  | 10 | 0.00                                             | 0.00  | 10 |
| Lymphocyte Absolute (10 <sup>3</sup> /μL)  | NA           | 4.96         | 0.26  | 10 | 6.46**                                          | 0.34  | 10 | 8.16***                                         | 0.59  | 10 | 8.55***                                          | 0.51  | 10 |
| Monocyte Absolute (10 <sup>3</sup> /μL)    | NA           | 0.13         | 0.01  | 10 | 0.15                                            | 0.02  | 10 | 0.24**                                          | 0.03  | 10 | 0.29***                                          | 0.01  | 10 |
| Eosinophils Absolute (10 <sup>3</sup> /μL) | NA           | 0.09         | 0.01  | 10 | 0.16                                            | 0.03  | 10 | 0.21*                                           | 0.04  | 10 | 0.13                                             | 0.01  | 10 |
| Basophils Absolute (10 <sup>3</sup> /μL)   | NA           | 0.01         | 0.00  | 10 | 0.02***                                         | 0.00  | 10 | 0.03***                                         | 0.00  | 10 | 0.04***                                          | 0.00  | 10 |

M= Male; AVG= Average; SEM= Standard Error of the Mean; N= Number; \*p<0.05, \*\*p<0.01, \*\*\*p<0.001 compared to Vehicle (1M) using T-test

**Table S2: Hematology analysis, Female, Main Study**

| Group                          | Normal Range | Vehicle (1F) |       |    | Allocetra-OTS 140x10 <sup>6</sup> cells/kg (2F) |       |    | Allocetra-OTS 700 x10 <sup>6</sup> cells/kg (3F) |       |    | Allocetra-OTS 1260 x10 <sup>6</sup> cells/kg (4F) |       |    |
|--------------------------------|--------------|--------------|-------|----|-------------------------------------------------|-------|----|--------------------------------------------------|-------|----|---------------------------------------------------|-------|----|
|                                |              | AVG          | SEM   | N  | AVG                                             | SEM   | N  | AVG                                              | SEM   | N  | AVG                                               | SEM   | N  |
| WBC (10*3/μL)                  | 5.3-16.7     | 6.35         | 0.36  | 10 | 6.81                                            | 0.21  | 10 | 7.43                                             | 0.50  | 10 | 7.02                                              | 0.49  | 10 |
| RBC (10*6/μL)                  | 7.4-9.28     | 7.38         | 0.05  | 10 | 7.37                                            | 0.10  | 10 | 7.32                                             | 0.07  | 10 | 7.32                                              | 0.08  | 10 |
| HGB (g/dL)                     | 14-16.9      | 14.56        | 0.14  | 10 | 14.55                                           | 0.21  | 10 | 14.39                                            | 0.14  | 10 | 14.52                                             | 0.12  | 10 |
| Hematocrit (%)                 | 42.7-52.4    | 45.58        | 0.45  | 10 | 45.68                                           | 0.62  | 10 | 45.36                                            | 0.49  | 10 | 45.82                                             | 0.45  | 10 |
| MCV (fL)                       | 53.1-61.0    | 61.82        | 0.55  | 10 | 62.01                                           | 0.51  | 10 | 62.05                                            | 0.90  | 10 | 62.68                                             | 0.75  | 10 |
| MCH (pg)                       | 17.2-19.8    | 19.77        | 0.17  | 10 | 19.74                                           | 0.16  | 10 | 19.67                                            | 0.20  | 10 | 19.87                                             | 0.13  | 10 |
| MCHC (g/dL)                    | 31.0-34.0    | 32.00        | 0.28  | 10 | 31.88                                           | 0.22  | 10 | 31.74                                            | 0.20  | 10 | 31.74                                             | 0.27  | 10 |
| Neutrophils (%)                | 5.0-19.0     | 23.10        | 2.34  | 10 | 17.72                                           | 2.70  | 10 | 15.00*                                           | 1.57  | 10 | 19.34                                             | 2.12  | 10 |
| Bands (%)                      | NA           | 0.00         | 0.00  | 10 | 0.00                                            | 0.00  | 10 | 0.00                                             | 0.00  | 10 | 0.00                                              | 0.00  | 10 |
| Lymphocytes (%)                | 75-90        | 71.54        | 2.32  | 10 | 76.95                                           | 2.81  | 10 | 78.30*                                           | 1.53  | 10 | 72.50                                             | 2.27  | 10 |
| Monocytes (%)                  | 0-5          | 1.32         | 0.17  | 10 | 1.53                                            | 0.10  | 10 | 1.88*                                            | 0.17  | 10 | 1.92**                                            | 0.12  | 10 |
| Eosinophils (%)                | 0-5          | 3.01         | 0.47  | 10 | 2.03                                            | 0.28  | 10 | 2.65                                             | 0.31  | 10 | 3.87                                              | 0.77  | 10 |
| Basophils (%)                  | 0-2          | 0.14         | 0.02  | 10 | 0.27**                                          | 0.03  | 10 | 0.28**                                           | 0.03  | 10 | 0.32***                                           | 0.02  | 10 |
| Platelets (10*3/μL)            | 550-1140     | 624.70       | 42.34 | 10 | 646.10                                          | 53.73 | 10 | 701.90                                           | 18.90 | 10 | 583.90                                            | 40.10 | 10 |
| Retic (%)                      | NA           | 2.17         | 0.17  | 10 | 2.19                                            | 0.08  | 10 | 2.44                                             | 0.25  | 10 | 2.39                                              | 0.17  | 10 |
| MPV (fL)                       | NA           | 8.84         | 0.41  | 10 | 8.81                                            | 0.33  | 10 | 8.95                                             | 0.28  | 10 | 9.61                                              | 0.31  | 10 |
| RDW (%)                        | NA           | 10.75        | 0.22  | 10 | 10.7                                            | 0.12  | 10 | 10.85                                            | 0.09  | 10 | 10.71                                             | 0.08  | 10 |
| Neutrophils Absolute (10*3/μL) | NA           | 1.486        | 0.18  | 10 | 1.215                                           | 0.19  | 10 | 1.117                                            | 0.14  | 10 | 1.382                                             | 0.19  | 10 |
| Bands Absolute (10*3/μL)       | NA           | 0            | 0.00  | 10 | 0                                               | 0.00  | 10 | 0                                                | 0.00  | 10 | 0                                                 | 0.00  | 10 |
| Lymphocyte Absolute (10*3/μL)  | NA           | 4.525        | 0.26  | 10 | 5.234                                           | 0.22  | 10 | 5.818*                                           | 0.42  | 10 | 5.082                                             | 0.36  | 10 |
| Monocyte Absolute (10*3/μL)    | NA           | 0.084        | 0.01  | 10 | 0.105                                           | 0.01  | 10 | 0.141*                                           | 0.02  | 10 | 0.131**                                           | 0.01  | 10 |
| Eosinophils Absolute (10*3/μL) | NA           | 0.193        | 0.03  | 10 | 0.141                                           | 0.02  | 10 | 0.191                                            | 0.02  | 10 | 0.253                                             | 0.03  | 10 |
| Basophils Absolute (10*3/μL)   | NA           | 0.009        | 0.00  | 10 | 0.017*                                          | 0.00  | 10 | 0.021**                                          | 0.00  | 10 | 0.022**                                           | 0.00  | 10 |

F= Female; AVG= Average; SEM= Standard Error of the Mean; N= Number; \*p<0.05, \*\*p<0.01, \*\*\*p<0.001 compared to Vehicle (1F) using T-test

**Table S3: Hematology analysis, Male, Recovery Phase 14 Days**

| Group                                | Normal Range | Vehicle (1M) |       |   | Allocetra-OTS 1260x10 <sup>6</sup> cells/kg (4M) |       |   |
|--------------------------------------|--------------|--------------|-------|---|--------------------------------------------------|-------|---|
|                                      |              | AVG          | SEM   | N | AVG                                              | SEM   | N |
| WBC (10*3/ $\mu$ L)                  | 6.4-18.8     | 7.35         | 1.26  | 5 | 6.47                                             | 0.88  | 5 |
| RBC (10*6/ $\mu$ L)                  | 7.8-9.38     | 8.38         | 0.13  | 5 | 7.98                                             | 0.22  | 5 |
| HGB (g/dL)                           | 14.6-16.8    | 15.14        | 0.28  | 5 | 15.22                                            | 0.25  | 5 |
| Hematocrit (%)                       | 45.4-54.1    | 49.84        | 1.30  | 5 | 49.08                                            | 0.87  | 5 |
| MCV (fL)                             | 53.3-62.4    | 59.44        | 1.04  | 5 | 61.58                                            | 1.16  | 5 |
| MCH (pg)                             | 17-19.6      | 18.10        | 0.37  | 5 | 19.12                                            | 0.41  | 5 |
| MCHC (g/dL)                          | 29.6-33.6    | 30.42        | 0.40  | 5 | 31.02                                            | 0.13  | 5 |
| Neutrophils (%)                      | 5.0-31.0     | 18.40        | 1.95  | 5 | 18.60                                            | 1.94  | 5 |
| Bands (%)                            | NA           | 0.00         | 0.00  | 5 | 0.00                                             | 0.00  | 5 |
| Lymphocytes (%)                      | 59-93        | 76.72        | 2.16  | 5 | 76.36                                            | 2.12  | 5 |
| Monocytes (%)                        | 0-6          | 2.32         | 0.09  | 5 | 1.92                                             | 0.16  | 5 |
| Eosinophils (%)                      | 0-4          | 1.16         | 0.20  | 5 | 1.90                                             | 0.34  | 5 |
| Basophils (%)                        | 0-2          | 0.14         | 0.05  | 5 | 0.18                                             | 0.04  | 5 |
| Platelets (10*3/ $\mu$ L)            | 453-1081     | 541.60       | 66.86 | 5 | 465.80                                           | 59.34 | 5 |
| Retic (%)                            | NA           | 2.17         | 0.39  | 5 | 2.06                                             | 0.12  | 5 |
| MPV (fL)                             | NA           | 9.76         | 0.93  | 5 | 9.86                                             | 0.42  | 5 |
| RDW (%)                              | NA           | 11.60        | 0.31  | 5 | 11.16                                            | 0.21  | 5 |
| Neutrophils Absolute (10*3/ $\mu$ L) | NA           | 1.35         | 0.26  | 5 | 1.14                                             | 0.06  | 5 |
| Bands Absolute (10*3/ $\mu$ L)       | NA           | 0.00         | 0.00  | 5 | 0.00                                             | 0.00  | 5 |
| Lymphocyte Absolute (10*3/ $\mu$ L)  | NA           | 5.65         | 1.00  | 5 | 5.01                                             | 0.83  | 5 |
| Monocyte Absolute (10*3/ $\mu$ L)    | NA           | 0.17         | 0.03  | 5 | 0.13                                             | 0.02  | 5 |
| Eosinophils Absolute (10*3/ $\mu$ L) | NA           | 0.08         | 0.01  | 5 | 0.12                                             | 0.02  | 5 |
| Basophils Absolute (10*3/ $\mu$ L)   | NA           | 0.01         | 0.00  | 5 | 0.01                                             | 0.00  | 5 |

M= Male; AVG= Average; SEM= Standard Error of the Mean; N= Number; \*p<0.05, \*\*p<0.01, \*\*\*p<0.001 compared to Vehicle (1M) using T-test

**Table S4: Hematology analysis, Female, Recovery Phase 14 Days**

| Group               | Normal Range | Vehicle (1F) |      |   | Allocetra-OTS 1260x10 <sup>6</sup> cells/kg (4F) |      |   |
|---------------------|--------------|--------------|------|---|--------------------------------------------------|------|---|
|                     |              | AVG          | SEM  | N | AVG                                              | SEM  | N |
| WBC (10*3/ $\mu$ L) | 5.3-16.7     | 6.41         | 0.33 | 5 | 6.16                                             | 1.01 | 5 |
| RBC (10*6/ $\mu$ L) | 7.4-9.28     | 7.76         | 0.13 | 5 | 8.36**                                           | 0.03 | 5 |
| HGB (g/dL)          | 14-16.9      | 15.06        | 0.28 | 5 | 15.70                                            | 0.16 | 5 |
| Hematocrit (%)      | 42.7-52.4    | 47.22        | 0.77 | 5 | 49.86*                                           | 0.53 | 5 |
| MCV (fL)            | 53.1-61.0    | 60.90        | 0.34 | 5 | 59.64                                            | 0.54 | 5 |
| MCH (pg)            | 17.2-19.8    | 19.42        | 0.17 | 5 | 18.76*                                           | 0.14 | 5 |
| MCHC (g/dL)         | 31.0-34.0    | 31.90        | 0.20 | 5 | 31.48                                            | 0.07 | 5 |
| Neutrophils (%)     | 5.0-19.0     | 22.72        | 4.27 | 5 | 25.20                                            | 5.44 | 5 |
| Bands (%)           | NA           | 0.00         | 0.00 | 5 | 0.00                                             | 0.00 | 5 |
| Lymphocytes (%)     | 75-90        | 72.18        | 4.15 | 5 | 68.84                                            | 5.62 | 5 |

| Group                                | Normal Range | Vehicle (1F) |       |   | Allocetra-OTS 1260x10 <sup>6</sup> cells/kg (4F) |       |   |
|--------------------------------------|--------------|--------------|-------|---|--------------------------------------------------|-------|---|
|                                      |              | AVG          | SEM   | N | AVG                                              | SEM   | N |
| Monocytes (%)                        | 0-5          | 1.72         | 0.29  | 5 | 2.26                                             | 0.28  | 5 |
| Eosinophils (%)                      | 0-5          | 2.36         | 0.12  | 5 | 2.60                                             | 0.54  | 5 |
| Basophils (%)                        | 0-2          | 0.16         | 0.02  | 5 | <b>0.22</b>                                      | 0.04  | 5 |
| Platelets (10*3/ $\mu$ L)            | 550-1140     | 610.80       | 69.28 | 5 | <b>537.60</b>                                    | 93.67 | 5 |
| Retic (%)                            | NA           | 1.67         | 0.19  | 5 | 1.56                                             | 0.14  | 5 |
| MPV (fL)                             | NA           | 9.24         | 0.25  | 5 | 10.14                                            | 1.04  | 5 |
| RDW %                                | NA           | 10.42        | 0.07  | 5 | 10.56                                            | 0.26  | 5 |
| Neutrophils Absolute (10*3/ $\mu$ L) | NA           | 1.45         | 0.29  | 5 | 1.76                                             | 0.68  | 5 |
| Bands Absolute (10*3/ $\mu$ L)       | NA           | 0.00         | 0.00  | 5 | 0.00                                             | 0.00  | 5 |
| Lymphocyte Absolute (10*3/ $\mu$ L)  | NA           | 4.63         | 0.35  | 5 | 4.02                                             | 0.27  | 5 |
| Monocyte Absolute (10*3/ $\mu$ L)    | NA           | 0.11         | 0.02  | 5 | 0.15                                             | 0.05  | 5 |
| Eosinophils Absolute (10*3/ $\mu$ L) | NA           | 0.15         | 0.01  | 5 | 0.16                                             | 0.04  | 5 |
| Basophils Absolute (10*3/ $\mu$ L)   | NA           | 0.01         | 0.00  | 5 | 0.01                                             | 0.01  | 5 |

F= Female; AVG= Average; SEM= Standard Error of the Mean; N= Number; \*p<0.05, \*\*p<0.01, \*\*\*p<0.001 compared to Vehicle (F) using T-test

**Table S5: Hematology analysis, Male, Recovery Phase 28 Days**

| Group                                | Normal Range | Vehicle (1M) |       |   | Allocetra-OTS 1260x10 <sup>6</sup> cells/kg (4M) |        |   |
|--------------------------------------|--------------|--------------|-------|---|--------------------------------------------------|--------|---|
|                                      |              | AVG          | SEM   | N | AVG                                              | SEM    | N |
| WBC (10*3/ $\mu$ L)                  | 6.4-18.8     | 7.76         | 0.76  | 5 | 7.87                                             | 0.25   | 5 |
| RBC (10*6/ $\mu$ L)                  | 7.8-9.38     | 8.35         | 0.06  | 5 | 8.61                                             | 0.21   | 5 |
| HGB (g/dL)                           | 14.6-16.8    | 15.50        | 0.04  | 5 | 15.60                                            | 0.19   | 5 |
| Hematocrit (%)                       | 45.4-54.1    | 48.78        | 0.46  | 5 | 49.08                                            | 0.69   | 5 |
| MCV (fL)                             | 53.3-62.4    | 58.40        | 0.35  | 5 | 57.12                                            | 0.97   | 5 |
| MCH (pg)                             | 17-19.6      | 18.68        | 0.10  | 5 | 18.16                                            | 0.39   | 5 |
| MCHC (g/dL)                          | 29.6-33.6    | 32.00        | 0.14  | 5 | 31.78                                            | 0.21   | 5 |
| Neutrophils (%)                      | 5.0-31.0     | 21.16        | 5.75  | 5 | 24.16                                            | 4.70   | 5 |
| Bands (%)                            | NA           | 0.00         | 0.00  | 5 | 0.00                                             | 0.00   | 5 |
| Lymphocytes (%)                      | 59-93        | 73.24        | 5.63  | 5 | 69.92                                            | 4.80   | 5 |
| Monocytes (%)                        | 0-6          | 2.40         | 0.22  | 5 | 2.74                                             | 0.32   | 5 |
| Eosinophils (%)                      | 0-4          | 1.96         | 0.24  | 5 | 1.96                                             | 0.61   | 5 |
| Basophils (%)                        | 0-2          | <b>0.24</b>  | 0.02  | 5 | 0.20                                             | 0.03   | 5 |
| Platelets (10*3/ $\mu$ L)            | 453-1081     | 569.50       | 46.33 | 5 | 520.00                                           | 107.52 | 5 |
| Retic (%)                            | NA           | 2.04         | 0.06  | 5 | 2.10                                             | 0.04   | 5 |
| MPV (fL)                             | NA           | 7.88         | 0.40  | 5 | 9.40                                             | 1.57   | 5 |
| RDW %                                | NA           | 10.82        | 0.08  | 5 | 11.10                                            | 0.26   | 5 |
| Neutrophils Absolute (10*3/ $\mu$ L) | NA           | 1.78         | 0.65  | 5 | 1.93                                             | 0.42   | 5 |
| Bands Absolute (10*3/ $\mu$ L)       | NA           | 0.00         | 0.00  | 5 | 0.00                                             | 0.00   | 5 |
| Lymphocyte Absolute (10*3/ $\mu$ L)  | NA           | 5.55         | 0.42  | 5 | 5.48                                             | 0.34   | 5 |
| Monocyte Absolute (10*3/ $\mu$ L)    | NA           | 0.18         | 0.02  | 5 | 0.22                                             | 0.03   | 5 |
| Eosinophils Absolute (10*3/ $\mu$ L) | NA           | 0.16         | 0.03  | 5 | 0.15                                             | 0.04   | 5 |
| Basophils Absolute (10*3/ $\mu$ L)   | NA           | 0.02         | 0.00  | 5 | 0.02                                             | 0.00   | 5 |

M= Male; AVG= Average; SEM= Standard Error of the Mean; N= Number; \*p<0.05,  
 \*\*p<0.01, \*\*\*p<0.001 compared to Vehicle (1M) using T-test

**Table S6: Hematology analysis, Female, Recovery Phase 28 Days**

| Group                                      | Normal Range | Vehicle (1F) |       |   | Allocetra-OTS 1260x10 <sup>6</sup> cells/kg (4F) |       |   |
|--------------------------------------------|--------------|--------------|-------|---|--------------------------------------------------|-------|---|
|                                            |              | AVG          | SEM   | N | AVG                                              | SEM   | N |
| WBC (10 <sup>3</sup> /μL)                  | 5.3-16.7     | 5.58         | 0.44  | 5 | 5.56                                             | 0.48  | 5 |
| RBC (10 <sup>6</sup> /μL)                  | 7.4-9.28     | 8.25         | 0.23  | 5 | 7.99                                             | 0.09  | 5 |
| HGB (g/dL)                                 | 14-16.9      | 15.30        | 0.23  | 5 | 15.10                                            | 0.20  | 5 |
| Hematocrit (%)                             | 42.7-52.4    | 47.26        | 1.00  | 5 | 46.16                                            | 0.70  | 5 |
| MCV (fL)                                   | 53.1-61.0    | 57.34        | 0.52  | 5 | 57.70                                            | 0.31  | 5 |
| MCH (pg)                                   | 17.2-19.8    | 18.58        | 0.26  | 5 | 18.86                                            | 0.07  | 5 |
| MCHC (g/dL)                                | 31.0-34.0    | 32.42        | 0.22  | 5 | 32.68                                            | 0.14  | 5 |
| Neutrophils (%)                            | 5.0-19.0     | 17.40        | 3.28  | 5 | 25.78                                            | 4.82  | 5 |
| Bands (%)                                  | NA           | 0.00         | 0.00  | 5 | 0.00                                             | 0.00  | 5 |
| Lymphocytes (%)                            | 75-90        | 77.70        | 3.23  | 5 | 69.12                                            | 4.81  | 5 |
| Monocytes (%)                              | 0-5          | 2.06         | 0.28  | 5 | 1.60                                             | 0.18  | 5 |
| Eosinophils (%)                            | 0-5          | 1.88         | 0.22  | 5 | 2.66                                             | 0.85  | 5 |
| Basophils (%)                              | 0-2          | 0.16         | 0.02  | 5 | 0.16                                             | 0.02  | 5 |
| Platelets (10 <sup>3</sup> /μL)            | 550-1140     | 717.80       | 55.14 | 5 | 611.60                                           | 35.98 | 5 |
| Retic (%)                                  | NA           | 1.64         | 0.16  | 5 | 1.63                                             | 0.16  | 5 |
| MPV (fL)                                   | NA           | 7.66         | 0.06  | 5 | 8.38                                             | 0.43  | 5 |
| RDW %                                      | NA           | 10.38        | 0.13  | 5 | 10.72                                            | 0.14  | 5 |
| Neutrophils Absolute (10 <sup>3</sup> /μL) | NA           | 0.92         | 0.11  | 5 | 1.45                                             | 0.33  | 5 |
| Bands Absolute (10 <sup>3</sup> /μL)       | NA           | 0.00         | 0.00  | 5 | 0.00                                             | 0.00  | 5 |
| Lymphocyte Absolute (10 <sup>3</sup> /μL)  | NA           | 4.39         | 0.51  | 5 | 3.82                                             | 0.35  | 5 |
| Monocyte Absolute (10 <sup>3</sup> /μL)    | NA           | 0.11         | 0.02  | 5 | 0.09                                             | 0.02  | 5 |
| Eosinophils Absolute (10 <sup>3</sup> /μL) | NA           | 0.10         | 0.01  | 5 | 0.15                                             | 0.05  | 5 |
| Basophils Absolute (10 <sup>3</sup> /μL)   | NA           | 0.01         | 0.00  | 5 | 0.01                                             | 0.00  | 5 |

F= Female; AVG= Average; SEM= Standard Error of the Mean; N= Number; \*p<0.05,  
 \*\*p<0.01, \*\*\*p<0.001 compared to Vehicle (1F) using T-test

**Table S7: Clinical chemistry, Male, Main Study**

| Group                       | Normal Range | Vehicle (1M) |       |    | Allocetra-OTS 140x10 <sup>6</sup> cells/kg (2M) |       |    | Allocetra-OTS 700x10 <sup>6</sup> cells/kg (3M) |       |    | Allocetra-OTS 1260x10 <sup>6</sup> cells/kg (4M) |        |    |
|-----------------------------|--------------|--------------|-------|----|-------------------------------------------------|-------|----|-------------------------------------------------|-------|----|--------------------------------------------------|--------|----|
|                             |              | AVG          | SEM   | N  | Average                                         | SEM   | N  | AVG                                             | SEM   | N  | AVG                                              | SEM    | N  |
| Creatinine (mg/dL)          | 0.27-0.65    | 0.26         | 0.01  | 10 | 0.26                                            | 0.01  | 10 | 0.28                                            | 0.02  | 10 | 0.27                                             | 0.01   | 10 |
| Calcium (mg/dL)             | 9.92-12.28   | 11.97        | 0.06  | 10 | 11.80                                           | 0.11  | 10 | 11.76*                                          | 0.06  | 10 | 11.83                                            | 0.08   | 10 |
| Phosphorus(mg/dL)           | 8.1-12.1     | 9.36         | 0.17  | 10 | 9.39                                            | 0.17  | 10 | 9.55                                            | 0.19  | 10 | 9.94*                                            | 0.14   | 10 |
| Glucose (mg/dL)             | 50-140       | 135.60       | 2.20  | 10 | 141.00                                          | 2.78  | 10 | 133.80                                          | 1.08  | 10 | 135.10                                           | 2.67   | 10 |
| Urea (mg/dL)                | 29.3-59.2    | 35.04        | 1.00  | 10 | 32.55                                           | 0.73  | 10 | 30.56**                                         | 0.98  | 10 | 32.42                                            | 0.99   | 10 |
| Cholesterol (mg/dL)         | 79-137       | 152.60       | 3.71  | 10 | 138.00*                                         | 4.74  | 10 | 141.30*                                         | 3.43  | 10 | 135.70**                                         | 4.13   | 10 |
| Total Protein (g/dL)        | 5.92-7.46    | 6.53         | 0.05  | 10 | 6.36*                                           | 0.04  | 10 | 6.40*                                           | 0.03  | 10 | 6.33*                                            | 0.05   | 10 |
| Albumin (g/dL)              | 3.96-4.73    | 4.72         | 0.04  | 10 | 4.62                                            | 0.05  | 10 | 4.58*                                           | 0.04  | 10 | 4.35***                                          | 0.06   | 10 |
| Globulin (g/dL)             | 1.69-3.01    | 1.81         | 0.05  | 10 | 1.74                                            | 0.04  | 10 | 1.82                                            | 0.05  | 10 | 1.98*                                            | 0.04   | 10 |
| Alb/Glob (Ratio)            | -            | 2.63         | 0.09  | 10 | 2.67                                            | 0.09  | 10 | 2.55                                            | 0.09  | 10 | 2.21**                                           | 0.07   | 10 |
| Total Bilirubin (mg/dL)     | 0.03-0.18    | 0.05         | 0.00  | 10 | 0.04                                            | 0.00  | 10 | 0.05                                            | 0.00  | 10 | 0.05                                             | 0.01   | 10 |
| Alkaline Phosphatase (IU/L) | 81-197       | 247.60       | 10.20 | 10 | 222.70                                          | 8.02  | 10 | 230.20                                          | 6.83  | 10 | 236.40                                           | 5.07   | 10 |
| LDH (IU/L)                  | 0-2990       | 443.30       | 41.82 | 10 | 451.90                                          | 46.54 | 10 | 517.10                                          | 44.33 | 10 | 416.10                                           | 33.99  | 10 |
| SGOT (IU/L)                 | 57-210       | 97.30        | 3.62  | 10 | 94.30                                           | 1.87  | 10 | 103.00                                          | 7.26  | 10 | 88.50                                            | 2.35   | 10 |
| SGPT (IU/L)                 | 30-106       | 59.50        | 2.80  | 10 | 57.40                                           | 1.09  | 10 | 60.30                                           | 3.11  | 10 | 55.30                                            | 1.19   | 10 |
| Triglycerides (mg/dL)       | 21-86        | 93.30        | 8.19  | 10 | 84.60                                           | 8.50  | 10 | 87.10                                           | 8.35  | 10 | 80.50                                            | 3.80   | 10 |
| CPK (IU/L)                  | 0-2296       | 589.10       | 75.47 | 10 | 656.10                                          | 80.06 | 10 | 656.40                                          | 55.39 | 10 | 690.00                                           | 100.13 | 10 |
| Na (mmol/L)                 | 142-147      | 142.00       | 0.26  | 10 | 142.10                                          | 0.38  | 10 | 142.00                                          | 0.26  | 10 | 142.10                                           | 0.31   | 10 |
| K (mmol/L)                  | 5.3-7.3      | 6.05         | 0.09  | 10 | 5.89                                            | 0.06  | 10 | 5.77*                                           | 0.08  | 10 | 5.89                                             | 0.07   | 10 |
| Chloride (mmol/L)           | 94-101       | 99.10        | 0.38  | 10 | 99.20                                           | 0.42  | 10 | 99.40                                           | 0.45  | 10 | 99.20                                            | 0.33   | 10 |
| GGTP (IU/L)                 | 0-1          | 0.00         | 0.00  | 10 | 0.00                                            | 0.00  | 10 | 0.00                                            | 0.00  | 10 | 0.00                                             | 0.00   | 10 |

M= Male; AVG= Average; SEM= Standard Error of the Mean; N= Number; \*p<0.05, \*\*p<0.01, \*\*\*p<0.001 compared to Vehicle (1M) using T-test



**Table S8: Clinical chemistry, Female, Main Study**

| Group                       | Normal Range       | Vehicle (1F)  |        |    | Allocetra-OTS 140x10 <sup>6</sup> cells/kg (2F) |       |    | Allocetra-OTS 700x10 <sup>6</sup> cells/kg (3F) |       |    | Allocetra-OTS 1260x10 <sup>6</sup> cells/kg (4F) |        |    |
|-----------------------------|--------------------|---------------|--------|----|-------------------------------------------------|-------|----|-------------------------------------------------|-------|----|--------------------------------------------------|--------|----|
|                             |                    | AVG           | SEM    | N  | AVG                                             | SEM   | N  | AVG                                             | SEM   | N  | AVG                                              | SEM    | N  |
| Creatinine (mg/dL)          | <b>0.28-0.65</b>   | <b>0.27</b>   | 0.01   | 10 | 0.28                                            | 0.01  | 10 | 0.29*                                           | 0.01  | 10 | 0.30                                             | 0.01   | 10 |
| Calcium (mg/dL)             | <b>10.16-12.03</b> | 11.72         | 0.09   | 10 | 11.97                                           | 0.10  | 10 | 11.72                                           | 0.09  | 10 | 11.80                                            | 0.11   | 10 |
| Phosphorus(mg/dL)           | <b>7.1-11.6</b>    | 9.25          | 0.26   | 10 | 9.20                                            | 0.30  | 10 | 8.79                                            | 0.11  | 10 | 9.52                                             | 0.28   | 10 |
| Glucose (mg/dL)             | <b>52-132</b>      | 127.90        | 2.24   | 10 | <b>136.20</b>                                   | 3.60  | 10 | <b>139.56**</b>                                 | 1.78  | 10 | <b>136.10*</b>                                   | 2.44   | 10 |
| Urea (mg/dL)                | <b>28.8-61.3</b>   | 33.19         | 1.16   | 10 | 34.03                                           | 1.26  | 10 | 31.07                                           | 1.71  | 10 | 30.89                                            | 1.20   | 10 |
| Cholesterol (mg/dL)         | <b>71-148</b>      | 130.10        | 4.66   | 10 | 133.50                                          | 6.14  | 10 | 130.90                                          | 4.36  | 10 | 133.30                                           | 5.65   | 10 |
| Total Protein (g/dL)        | <b>6-7.31</b>      | 6.44          | 0.05   | 10 | 6.36                                            | 0.08  | 10 | 6.41                                            | 0.08  | 10 | 6.52                                             | 0.06   | 10 |
| Albumin (g/dL)              | <b>4.20-4.99</b>   | 4.84          | 0.06   | 10 | 4.74                                            | 0.05  | 10 | 4.65*                                           | 0.06  | 10 | 4.61**                                           | 0.05   | 10 |
| Globulin (g/dL)             | <b>1.59-2.54</b>   | 1.60          | 0.05   | 10 | 1.62                                            | 0.06  | 10 | 1.76*                                           | 0.05  | 10 | 1.91***                                          | 0.04   | 10 |
| Alb/Glob (Ratio)            | -                  | 3.06          | 0.12   | 10 | 2.97                                            | 0.13  | 10 | 2.66*                                           | 0.09  | 10 | 2.43***                                          | 0.06   | 10 |
| Total Bilirubin (mg/dL)     | <b>0.04-0.21</b>   | <b>0.03</b>   | 0.00   | 10 | <b>0.03</b>                                     | 0.01  | 10 | 0.04                                            | 0.00  | 10 | <b>0.03</b>                                      | 0.01   | 10 |
| Alkaline Phosphatase (IU/L) | <b>50-153</b>      | <b>185.30</b> | 8.30   | 10 | <b>192.00</b>                                   | 11.33 | 10 | <b>176.60</b>                                   | 7.69  | 10 | <b>174.00</b>                                    | 8.50   | 10 |
| LDH (IU/L)                  | <b>0-3062</b>      | 727.60        | 60.05  | 10 | 524.80*                                         | 56.97 | 10 | 574.20                                          | 52.68 | 10 | 481.80**                                         | 30.67  | 10 |
| SGOT (IU/L)                 | <b>70-178</b>      | 109.60        | 3.34   | 10 | 98.20*                                          | 2.79  | 10 | 98.70*                                          | 3.83  | 10 | 102.40                                           | 5.12   | 10 |
| SGPT (IU/L)                 | <b>30-82</b>       | 56.30         | 2.81   | 10 | 55.80                                           | 2.57  | 10 | 48.60*                                          | 1.75  | 10 | 51.00                                            | 1.62   | 10 |
| Triglycerides (mg/dL)       | <b>16-77</b>       | 73.00         | 4.53   | 10 | 64.30                                           | 2.88  | 10 | 65.70                                           | 5.33  | 10 | 64.40                                            | 4.82   | 10 |
| CPK (IU/L)                  | <b>0-1595</b>      | 1094.00       | 246.38 | 10 | 619.50                                          | 73.75 | 10 | 696.30                                          | 82.55 | 10 | 891.50                                           | 294.61 | 10 |
| Na (mmol/L)                 | <b>141-148</b>     | <b>139.30</b> | 0.37   | 10 | <b>139.60</b>                                   | 0.40  | 10 | <b>140.80**</b>                                 | 0.13  | 10 | <b>139.90</b>                                    | 0.46   | 10 |
| K (mmol/L)                  | <b>5.1-6.8</b>     | 5.68          | 0.08   | 10 | 5.63                                            | 0.06  | 10 | 5.78                                            | 0.06  | 10 | 5.72                                             | 0.07   | 10 |
| Chloride (mmol/L)           | <b>94-104</b>      | 99.30         | 0.40   | 10 | 99.20                                           | 0.47  | 10 | 99.70                                           | 0.40  | 10 | 99.60                                            | 0.37   | 10 |
| GGTP (IU/L)                 | <b>0-1</b>         | 0.00          | 0.00   | 10 | 0.00                                            | 0.00  | 10 | 0.00                                            | 0.00  | 10 | 0.00                                             | 0.00   | 10 |

F= Female; AVG= Average; SEM= Standard Error of the Mean; N= Number; \*p<0.05, \*\*p<0.01, \*\*\*p<0.001 compared to Vehicle (1F) using T-test

**Table S9: Clinical chemistry, Male, Recovery 14 Days Phase**

| Group                              | Normal range      | Vehicle (1M)  |        |   | Allocetra-OTS 1260x10 <sup>6</sup> cells/kg (4M) |        |   |
|------------------------------------|-------------------|---------------|--------|---|--------------------------------------------------|--------|---|
|                                    |                   | AVG           | SEM    | N | AVG                                              | SEM    | N |
| <b>Creatinine (mg/dL)</b>          | <b>0.27-0.65</b>  | 0.31          | 0.02   | 5 | 0.31                                             | 0.01   | 5 |
| <b>Calcium (mg/dL)</b>             | <b>9.92-12.28</b> | 11.89         | 0.06   | 5 | 11.92                                            | 0.10   | 5 |
| <b>Phosphorus(mg/dL)</b>           | <b>8.1-12.1</b>   | 8.90          | 0.20   | 5 | 9.10                                             | 0.16   | 5 |
| <b>Glucose (mg/dL)</b>             | <b>50-140</b>     | <b>140.40</b> | 3.53   | 5 | <b>142.80</b>                                    | 2.35   | 5 |
| <b>Urea (mg/dL)</b>                | <b>29.3-59.2</b>  | 35.10         | 1.11   | 5 | 35.92                                            | 1.66   | 5 |
| <b>Cholesterol (mg/dL)</b>         | <b>79-137</b>     | <b>141.00</b> | 4.86   | 5 | 135.40                                           | 8.12   | 5 |
| <b>Total Protein (g/dL)</b>        | <b>5.92-7.46</b>  | 6.90          | 0.04   | 5 | 6.85                                             | 0.19   | 5 |
| <b>Albumin (g/dL)</b>              | <b>3.96-4.73</b>  | 4.70          | 0.11   | 5 | 4.56                                             | 0.10   | 5 |
| <b>Globulin (g/dL)</b>             | <b>1.69-3.01</b>  | 2.20          | 0.09   | 5 | 2.29                                             | 0.13   | 5 |
| <b>Alb/Glob (Ratio)</b>            | -                 | 2.16          | 0.13   | 5 | 2.01                                             | 0.12   | 5 |
| <b>Total Bilirubin (mg/dL)</b>     | <b>0.03-0.18</b>  | 0.04          | 0.00   | 5 | 0.03                                             | 0.00   | 5 |
| <b>Alkaline Phosphatase (IU/L)</b> | <b>81-197</b>     | <b>262.60</b> | 13.95  | 5 | <b>231.20</b>                                    | 8.47   | 5 |
| <b>LDH (IU/L)</b>                  | <b>0-2990</b>     | 564.60        | 102.31 | 5 | 442.20                                           | 58.71  | 5 |
| <b>SGOT (IU/L)</b>                 | <b>57-210</b>     | 106.80        | 7.52   | 5 | 98.60                                            | 2.40   | 5 |
| <b>SGPT (IU/L)</b>                 | <b>30-106</b>     | 66.80         | 3.79   | 5 | 69.20                                            | 2.65   | 5 |
| <b>Triglycerides (mg/dL)</b>       | <b>21-86</b>      | <b>94.00</b>  | 6.19   | 5 | <b>110.40</b>                                    | 8.87   | 5 |
| <b>CPK (IU/L)</b>                  | <b>0-2296</b>     | 635.60        | 67.43  | 5 | 682.40                                           | 157.40 | 5 |
| <b>Na (mmol/L)</b>                 | <b>142-147</b>    | 142.00        | 0.55   | 5 | 142.80                                           | 0.58   | 5 |
| <b>K (mmol/L)</b>                  | <b>5.3-7.3</b>    | 5.88          | 0.12   | 5 | 5.54*                                            | 0.07   | 5 |
| <b>Chloride (mmol/L)</b>           | <b>94-101</b>     | 100.60        | 0.60   | 5 | <b>101.20</b>                                    | 0.58   | 5 |
| <b>GGTP (IU/L)</b>                 | <b>0-1</b>        | 0.00          | 0.00   | 5 | 0.00                                             | 0.00   | 5 |

M= Male; AVG= Average; SEM= Standard Error of the Mean; N= Number; \*p<0.05,

\*\*p<0.01, \*\*\*p<0.001 compared to Vehicle (1M) using T-test

**Table S10: Clinical chemistry, Female, Recovery 14 Days Phase**

| Group                              | Normal Range       | Vehicle (1F)  |        |   | Allocetra-OTS 1260x10 <sup>6</sup> cells/kg (4F) |        |   |
|------------------------------------|--------------------|---------------|--------|---|--------------------------------------------------|--------|---|
|                                    |                    | AVG           | SEM    | N | AVG                                              | SEM    | N |
| <b>Creatinine (mg/dL)</b>          | <b>0.28-0.65</b>   | 0.33          | 0.01   | 5 | 0.33                                             | 0.03   | 5 |
| <b>Calcium (mg/dL)</b>             | <b>10.16-12.03</b> | 11.40         | 0.19   | 5 | 11.68                                            | 0.16   | 5 |
| <b>Phosphorus(mg/dL)</b>           | <b>7.1-11.6</b>    | 8.68          | 0.16   | 5 | 8.22                                             | 0.49   | 5 |
| <b>Glucose (mg/dL)</b>             | <b>52-132</b>      | <b>138.80</b> | 3.84   | 5 | <b>152.20</b>                                    | 9.14   | 5 |
| <b>Urea (mg/dL)</b>                | <b>28.8-61.3</b>   | 37.94         | 2.35   | 5 | 37.40                                            | 1.40   | 5 |
| <b>Cholesterol (mg/dL)</b>         | <b>71-148</b>      | 129.80        | 7.00   | 5 | 142.40                                           | 12.15  | 5 |
| <b>Total Protein (g/dL)</b>        | <b>6-7.31</b>      | 6.72          | 0.10   | 5 | 6.91                                             | 0.09   | 5 |
| <b>Albumin (g/dL)</b>              | <b>4.20-4.99</b>   | 4.78          | 0.10   | 5 | 4.98                                             | 0.07   | 5 |
| <b>Globulin (g/dL)</b>             | <b>1.59-2.54</b>   | 1.94          | 0.07   | 5 | 1.93                                             | 0.10   | 5 |
| <b>Alb/Glob (Ratio)</b>            | -                  | 2.47          | 0.11   | 5 | 2.61                                             | 0.16   | 5 |
| <b>Total Bilirubin (mg/dL)</b>     | <b>0.04-0.21</b>   | 0.04          | 0.01   | 5 | 0.04                                             | 0.01   | 5 |
| <b>Alkaline Phosphatase (IU/L)</b> | <b>50-153</b>      | <b>192.80</b> | 7.96   | 5 | <b>200.40</b>                                    | 8.29   | 5 |
| <b>LDH (IU/L)</b>                  | <b>0-3062</b>      | 792.20        | 66.21  | 5 | 547.20*                                          | 49.79  | 5 |
| <b>SGOT (IU/L)</b>                 | <b>70-178</b>      | 110.40        | 4.93   | 5 | 168.80                                           | 72.32  | 5 |
| <b>SGPT (IU/L)</b>                 | <b>30-82</b>       | 68.60         | 4.20   | 5 | <b>96.80</b>                                     | 37.21  | 5 |
| <b>Triglycerides (mg/dL)</b>       | <b>16-77</b>       | 58.40         | 4.83   | 5 | 69.40                                            | 7.70   | 5 |
| <b>CPK (IU/L)</b>                  | <b>0-1595</b>      | 1298.60       | 414.49 | 5 | 907.80                                           | 188.42 | 5 |
| <b>Na (mmol/L)</b>                 | <b>141-148</b>     | 141.80        | 0.49   | 5 | 142.20                                           | 0.58   | 5 |
| <b>K (mmol/L)</b>                  | <b>5.1-6.8</b>     | 5.50          | 0.11   | 5 | 5.50                                             | 0.13   | 5 |
| <b>Chloride (mmol/L)</b>           | <b>94-104</b>      | 101.80        | 0.80   | 5 | 102.20                                           | 0.66   | 5 |
| <b>GGTP (IU/L)</b>                 | <b>0-1</b>         | 0.00          | 0.00   | 5 | 0.00                                             | 0.00   | 5 |

F= Female; AVG= Average; SEM= Standard Error of the Mean; N= Number

\*p<0.05, \*\*p<0.01, \*\*\*p<0.001 compared to Vehicle (1F) using T-test

**Table S11: Clinical chemistry, Male, Recovery 28 Days Phase**

| Group                       | Normal Range | Vehicle (1M) |        |   | Allocetra-OTS 1260x10 <sup>6</sup> cells/kg (4M) |       |   |
|-----------------------------|--------------|--------------|--------|---|--------------------------------------------------|-------|---|
|                             |              | AVG          | SEM    | N | AVG                                              | SEM   | N |
| Creatinine (mg/dL)          | 0.27-0.65    | 0.29         | 0.07   | 5 | 0.27                                             | 0.05  | 5 |
| Calcium (mg/dL)             | 9.92-12.28   | 11.53        | 0.15   | 5 | 11.55                                            | 0.05  | 5 |
| Phosphorus(mg/dL)           | 8.1-12.1     | 8.40         | 0.19   | 5 | 8.60                                             | 0.12  | 5 |
| Glucose (mg/dL)             | 50-140       | 132.60       | 2.84   | 5 | 134.60                                           | 4.12  | 5 |
| Urea (mg/dL)                | 29.3-59.2    | 37.60        | 0.93   | 5 | 36.70                                            | 1.35  | 5 |
| Cholesterol (mg/dL)         | 79-137       | 145.00       | 7.86   | 5 | 132.80                                           | 13.92 | 5 |
| Total Protein (g/dL)        | 5.92-7.46    | 7.01         | 0.11   | 5 | 6.95                                             | 0.09  | 5 |
| Albumin (g/dL)              | 3.96-4.73    | 4.32         | 0.06   | 5 | 4.24                                             | 0.05  | 5 |
| Globulin (g/dL)             | 1.69-3.01    | 2.69         | 0.11   | 5 | 2.71                                             | 0.12  | 5 |
| Alb/Glob (Ratio)            |              | 1.62         | 0.07   | 5 | 1.58                                             | 0.09  | 5 |
| Total Bilirubin (mg/dL)     | 0.03-0.18    | 0.05         | 0.01   | 5 | 0.06                                             | 0.00  | 5 |
| Alkaline Phosphatase (IU/L) | 81-197       | 230.20       | 16.21  | 5 | 223.80                                           | 15.59 | 5 |
| LDH (IU/L)                  | 0-2990       | 442.20       | 73.70  | 5 | 331.20                                           | 44.46 | 5 |
| SGOT (IU/L)                 | 57-210       | 103.00       | 6.58   | 5 | 99.40                                            | 3.63  | 5 |
| SGPT (IU/L)                 | 30-106       | 71.60        | 2.62   | 5 | 75.40                                            | 2.94  | 5 |
| Triglycerides (mg/dL)       | 21-86        | 76.40        | 5.30   | 5 | 81.40                                            | 5.14  | 5 |
| CPK (IU/L)                  | 0-2296       | 523.60       | 144.03 | 5 | 458.60                                           | 82.52 | 5 |
| Na (mmol/L)                 | 142-147      | 140.00       | 0.55   | 5 | 141.40                                           | 0.93  | 5 |
| K (mmol/L)                  | 5.3-7.3      | 5.70         | 0.07   | 5 | 5.64                                             | 0.07  | 5 |
| Chloride (mmol/L)           | 94-101       | 96.20        | 1.32   | 5 | 96.60                                            | 1.69  | 5 |
| GGTP (IU/L)                 | 0-1          | 0.00         | 0.00   | 5 | 0.00                                             | 0.00  | 5 |

M= Male; AVG= Average; SEM= Standard Error of the Mean; N= Number

\*p<0.05, \*\*p<0.01, \*\*\*p<0.001 compared to Vehicle (1M) using T-test

**Table S12: Clinical chemistry, Female, Recovery 28 Days Phase**

| Group                       | Normal Range       | Vehicle (1F)  |       |   | Allocetra-OTS 1260x10 <sup>6</sup> cells/kg (4F) |        |   |
|-----------------------------|--------------------|---------------|-------|---|--------------------------------------------------|--------|---|
|                             |                    | AVG           | SEM   | N | AVG                                              | SEM    | N |
| Creatinine (mg/dL)          | <b>0.28-0.65</b>   | 0.35          | 0.01  | 5 | 0.36                                             | 0.01   | 5 |
| Calcium (mg/dL)             | <b>10.16-12.03</b> | 11.28         | 0.14  | 5 | 11.32                                            | 0.10   | 5 |
| Phosphorus(mg/dL)           | <b>7.1-11.6</b>    | 8.20          | 0.43  | 5 | 7.70                                             | 0.35   | 5 |
| Glucose (mg/dL)             | <b>52-132</b>      | <b>135.40</b> | 2.42  | 5 | <b>136.60</b>                                    | 4.57   | 5 |
| Urea (mg/dL)                | <b>28.8-61.3</b>   | 38.62         | 1.13  | 5 | 40.28                                            | 1.87   | 5 |
| Cholesterol (mg/dL)         | <b>71-148</b>      | 114.60        | 4.40  | 5 | 131.40                                           | 10.33  | 5 |
| Total Protein (g/dL)        | <b>6-7.31</b>      | 6.80          | 0.17  | 5 | 7.00                                             | 0.07   | 5 |
| Albumin (g/dL)              | <b>4.20-4.99</b>   | 4.56          | 0.10  | 5 | 4.54                                             | 0.02   | 5 |
| Globulin (g/dL)             | <b>1.59-2.54</b>   | 2.24          | 0.08  | 5 | 2.46                                             | 0.09   | 5 |
| Alb/Glob (Ratio)            | -                  | 2.05          | 0.06  | 5 | 1.86                                             | 0.08   | 5 |
| Total Bilirubin (mg/dL)     | <b>0.04-0.21</b>   | 0.05          | 0.01  | 5 | 0.06                                             | 0.01   | 5 |
| Alkaline Phosphatase (IU/L) | <b>50-153</b>      | <b>203.60</b> | 20.69 | 5 | <b>194.40</b>                                    | 16.27  | 5 |
| LDH (IU/L)                  | <b>0-3062</b>      | 539.20        | 68.21 | 5 | 545.80                                           | 60.20  | 5 |
| SGOT (IU/L)                 | <b>70-178</b>      | 104.20        | 5.58  | 5 | 104.00                                           | 4.79   | 5 |
| SGPT (IU/L)                 | <b>30-82</b>       | 64.60         | 0.87  | 5 | 73.00                                            | 4.16   | 5 |
| Triglycerides (mg/dL)       | <b>16-77</b>       | 64.60         | 2.20  | 5 | 55.00                                            | 4.36   | 5 |
| CPK (IU/L)                  | <b>0-1595</b>      | 527.40        | 84.15 | 5 | <b>1651.20</b>                                   | 586.67 | 5 |
| Na (mmol/L)                 | <b>141-148</b>     | <b>140.80</b> | 0.20  | 5 | <b>140.60</b>                                    | 0.24   | 5 |
| K (mmol/L)                  | <b>5.1-6.8</b>     | 5.50          | 0.05  | 5 | 5.48                                             | 0.10   | 5 |
| Chloride (mmol/L)           | <b>94-104</b>      | 99.60         | 0.68  | 5 | 99.60                                            | 0.68   | 5 |
| GGTP (IU/L)                 | <b>0-1</b>         | 0.00          | 0.00  | 5 | 0.00                                             | 0.00   | 5 |

F= Female; AVG= Average; SEM= Standard Error of the Mean; N= Number

\*p<0.05, \*\*p<0.01, \*\*\*p<0.001 compared to Vehicle (1F) using T-test

**Table S13: Coagulation, Males and Females, Main study**

| Group              | Normal Range | Vehicle (1M) |       |    | Allocetra-OTS 140x10 <sup>6</sup> cells/kg (2M) |       |    | Allocetra-OTS 700x10 <sup>6</sup> cells/kg (3M) |       |    | Allocetra-OTS 1260x10 <sup>6</sup> cells/kg (4M) |       |    |
|--------------------|--------------|--------------|-------|----|-------------------------------------------------|-------|----|-------------------------------------------------|-------|----|--------------------------------------------------|-------|----|
|                    |              | AVG          | SEM   | N  | AVG                                             | SEM   | N  | AVG                                             | SEM   | N  | AVG                                              | SEM   | N  |
| Fibrinogen (mg/dL) | NA           | 191.00       | 14.20 | 10 | 201.90                                          | 16.14 | 10 | 232.90*                                         | 12.17 | 10 | 277.56**                                         | 16.51 | 10 |
| PT (sec)           | 10-17.1      | 10.45        | 0.18  | 10 | 10.45                                           | 0.17  | 10 | 10.27                                           | 0.08  | 10 | 10.14                                            | 0.05  | 10 |
| aPTT (sec)         | 12.2-42.6    | 14.03        | 0.68  | 10 | 14.18                                           | 0.58  | 10 | 16.16                                           | 0.91  | 10 | 15.89*                                           | 0.54  | 10 |
| Group              | Normal Range | Vehicle (1F) |       |    | Allocetra-OTS 140x10 <sup>6</sup> cells/kg (2F) |       |    | Allocetra-OTS 700x10 <sup>6</sup> cells/kg (3F) |       |    | Allocetra-OTS 1260x10 <sup>6</sup> cells/kg (4F) |       |    |
|                    |              | AVG          | SEM   | N  | AVG                                             | SEM   | N  | AVG                                             | SEM   | N  | AVG                                              | SEM   | N  |
| Fibrinogen (mg/dL) | NA           | 209.4        | 14.68 | 10 | 244.5                                           | 8.31  | 10 | 232.9                                           | 11.12 | 10 | 209.6                                            | 16.98 | 10 |
| PT (sec)           | 10-17.1      | 10.43        | 0.19  | 10 | 10.22                                           | 0.06  | 10 | 10.4                                            | 0.09  | 10 | 10.57                                            | 0.18  | 10 |
| aPTT (sec)         | 12.2-42.6    | 15.27        | 0.63  | 10 | 15.89                                           | 1.08  | 10 | 15.54                                           | 0.86  | 10 | 14.41                                            | 1.35  | 10 |

M= Male; F= Female; AVG= Average; SEM= Standard Error of the Mean; N= Number, NA=Not Applicable

\*p<0.05, \*\*p<0.01 compared to Vehicle (1M) using T-test

**Table S14: Coagulation, Males and Females, Recovery 14 Days Phase**

| Group              | Normal Range | Vehicle (1M) |      |   | Allocetra-OTS 1260x10 <sup>6</sup> cells/kg (4M) |       |   |
|--------------------|--------------|--------------|------|---|--------------------------------------------------|-------|---|
|                    |              | AVG          | SEM  | N | AVG                                              | SEM   | N |
| Fibrinogen (mg/dL) | NA           | 257.40       | 6.70 | 5 | 243.00                                           | 14.46 | 5 |
| PT (sec)           | 10-17.1      | 10.30        | 0.03 | 5 | 10.38                                            | 0.07  | 5 |
| aPTT (sec)         | 12.2-42.6    | 14.80        | 0.44 | 5 | 15.20                                            | 0.29  | 5 |
| Group              | Normal Range | Vehicle (1F) |      |   | Allocetra-OTS 1260x10 <sup>6</sup> cells/kg (4F) |       |   |
|                    |              | AVG          | SEM  | N | AVG                                              | SEM   | N |
| Fibrinogen (mg/dL) | NA           | 202.80       | 8.56 | 5 | 203.60                                           | 13.64 | 5 |
| PT (sec)           | 10-17.1      | 10.34        | 0.09 | 5 | 10.34                                            | 0.13  | 5 |
| aPTT (sec)         | 12.2-42.6    | 18.14        | 0.74 | 5 | 16.96                                            | 0.65  | 5 |

M= Male; F= Female; AVG= Average; SEM= Standard Error of the Mean; N= Number, NA=Not Applicable

**Table S15: Coagulation, Males and Females, Recovery 28 Days Phase**

| Group              | Normal Range | Vehicle (1M) |       |   | Allocetra-OTS 1260x10 <sup>6</sup> cells/kg (4M) |       |   |
|--------------------|--------------|--------------|-------|---|--------------------------------------------------|-------|---|
|                    |              | AVG          | SEM   | N | AVG                                              | SEM   | N |
| Fibrinogen (mg/dL) | NA           | 252.80       | 13.47 | 5 | 239.6                                            | 19.48 | 5 |
| PT (sec)           | 10-17.1      | 10.28        | 0.12  | 5 | 10.42                                            | 0.17  | 5 |
| aPTT (sec)         | 12.2-42.6    | 15.64        | 0.46  | 5 | 17.62**                                          | 0.30  | 5 |
| Group              | Normal Range | Vehicle (1F) |       |   | Allocetra-OTS 1260x10 <sup>6</sup> cells/kg (4F) |       |   |
|                    |              | AVG          | SEM   | N | AVG                                              | SEM   | N |
| Fibrinogen (mg/dL) | NA           | 225.6        | 7.33  | 5 | 223.2                                            | 17.30 | 5 |
| PT (sec)           | 10-17.1      | 9.88         | 0.04  | 5 | 10.06                                            | 0.10  | 5 |
| aPTT (sec)         | 12.2-42.6    | 15.08        | 0.12  | 5 | 15.98                                            | 0.56  | 5 |

M= Male; F= Female; AVG= Average; SEM= Standard Error of the Mean; N= Number; NA=Not Applicable

\*\*p<0.01 compared to Vehicle (1M) using T-test



| Block No. | Group/Animal Tissue Name                          | Vehicle (1M) |   |   |   |   |    |    |    |    |    |
|-----------|---------------------------------------------------|--------------|---|---|---|---|----|----|----|----|----|
|           |                                                   | 1            | 2 | 3 | 4 | 5 | 81 | 82 | 83 | 84 | 85 |
|           | <b>Mandibular Lymph Nodes</b>                     |              |   |   |   |   |    |    |    |    |    |
|           | <i>Lymphoid follicles – increased cellularity</i> | 2            | 2 | 2 | 2 | 2 | 2  | 2  | 2  | 2  | 2  |
| 16        | <b>Pituitary</b>                                  | 0            | 0 | 0 | 0 | 0 | 0  | 0  | 0  | 0  | 0  |
| 17        | <b>Adrenals</b>                                   | 0            | 0 | 0 | 0 |   | 0  | 0  | 0  | 0  | 0  |
|           | <i>Accessory nodules</i>                          |              |   |   |   | 1 |    |    |    |    |    |
| 18        | <b>Thyroids</b>                                   | 0            | 0 | 0 | 0 | 0 | 0  | 0  | 0  | 0  | 0  |
|           | <b>Parathyroids</b>                               | 0            | 0 | 0 | 0 | 0 | 0  | 0  | 0  | 0  | 0  |
| 19        | <b>Eyes</b>                                       | 0            | 0 | 0 | 0 | 0 | 0  | 0  | 0  | 0  | 0  |
|           | <b>Optic Nerves (x 2)</b>                         | 0            | 0 | 0 | 0 | 0 | 0  | 0  | 0  | 0  | 0  |
| 20        | <b>Sciatic Nerve (LS x 1, TS x 1)</b>             | 0            | 0 | 0 | 0 | 0 | 0  | 0  | 0  | 0  | 0  |
| 21        | <b>Spinal Cord (TS x 3)</b>                       | 0            | 0 | 0 | 0 | 0 | 0  | 0  | 0  | 0  | 0  |
| 22        | <b>Epididymis (LS whole x 2)</b>                  | 0            | 0 | 0 | 0 | 0 | 0  | 0  | 0  | 0  | 0  |
| 23        | <b>Seminal Vesicles (TS x 2)</b>                  | 0            | 0 | 0 | 0 | 0 | 0  | 0  | 0  | 0  | 0  |
|           | <b>Prostate (TS)</b>                              | 0            | 0 | 0 | 0 | 0 | 0  | 0  | 0  | 0  | 0  |
| 24        | <b>Sternum/ Bone Marrow</b>                       | 0            | 0 | 0 | 0 | 0 | 0  | 0  | 0  | 0  | 0  |
| 25        | <b>Femur (femoro-tibial joint)</b>                | 0            | 0 | 0 | 0 | 0 | 0  | 0  | 0  | 0  | 0  |

0 = No Lesion; 1 = Minimal Change; 2 = Mild Change; 3 = Moderate Change; 4 = Marked Change

**Table S17: Individual histopathological findings- Male Main study (Group 2M)**

| Block No. | Group/Animal Tissue Name                           | Allocetra-OTS 140x10 <sup>6</sup> cells /kg (2M) |   |   |   |    |    |    |    |    |    |
|-----------|----------------------------------------------------|--------------------------------------------------|---|---|---|----|----|----|----|----|----|
|           |                                                    | 6                                                | 7 | 8 | 9 | 10 | 86 | 87 | 88 | 89 | 90 |
| 2         | <b>Liver (Left and median lobes x2)</b>            |                                                  |   | 0 |   | 0  |    |    |    |    | 0  |
|           | <i>Extramedullary hematopoiesis</i>                | 1                                                | 1 |   | 1 |    | 1  | 1  | 1  | 1  |    |
|           | <b>Spleen (TS)</b>                                 |                                                  |   |   |   |    |    |    |    |    |    |
|           | <i>Red pulp - Extramedullary hematopoiesis</i>     | 2                                                | 2 | 2 | 2 | 2  | 2  | 2  | 2  | 2  | 2  |
|           | <i>Red pulp – single cell necrosis (apoptosis)</i> | 1                                                | 1 | 2 | 2 | 2  | 2  | 2  | 2  | 2  | 2  |

0 = No Lesion; 1 = Minimal Change; 2 = Mild Change; 3 = Moderate Change; 4 = Marked Change



**Table S18: Individual histopathological findings- Male Main study (Group 3M)**

| Block No. | Group/Animal Tissue Name                           | Allocetra-OTS 700x10 <sup>6</sup> cells /kg (3M) |    |    |    |    |    |    |    |    |    |
|-----------|----------------------------------------------------|--------------------------------------------------|----|----|----|----|----|----|----|----|----|
|           |                                                    | 21                                               | 22 | 23 | 24 | 25 | 91 | 92 | 93 | 94 | 95 |
| 2         | <b>Liver (Left and median lobes x2)</b>            |                                                  |    |    |    |    |    |    |    |    |    |
|           | <i>Extramedullary hematopoiesis</i>                | 1                                                | 1  | 1  | 1  | 1  | 1  | 1  | 1  | 1  | 1  |
|           | <b>Spleen (TS)</b>                                 |                                                  |    |    |    |    |    |    |    |    |    |
|           | <i>Red pulp - Extramedullary hematopoiesis</i>     | 3                                                | 3  | 3  | 3  | 3  | 3  | 3  | 3  | 3  | 3  |
|           | <i>Red pulp – single cell necrosis (apoptosis)</i> | 2                                                | 2  | 2  | 2  | 2  | 2  | 2  | 2  | 2  | 2  |

0 = No Lesion; 1 = Minimal Change; 2 = Mild Change; 3 = Moderate Change; 4 = Marked Change

**Table S19: Individual histopathological findings- Male Main Study (Group 4M)**

| Block No. | Group/Animal Tissue Name                           | Allocetra-OTS 1260x10 <sup>6</sup> cells /kg (4M) |    |    |    |    |    |    |    |    |     |
|-----------|----------------------------------------------------|---------------------------------------------------|----|----|----|----|----|----|----|----|-----|
|           |                                                    | 26                                                | 27 | 28 | 29 | 30 | 96 | 97 | 98 | 99 | 100 |
| 1         | <b>Heart (LS)</b>                                  | 0                                                 | 0  | 0  | 0  | 0  | 0  | 0  | 0  | 0  | 0   |
|           | <b>Lungs (TS x 2)</b>                              | 0                                                 | 0  | 0  | 0  | 0  | 0  | 0  | 0  | 0  | 0   |
|           | <i>Alveolar histiocytosis</i>                      |                                                   |    |    |    |    |    |    |    |    |     |
|           | <i>Crystals</i>                                    |                                                   |    |    |    |    |    |    |    |    |     |
| 2         | <b>Liver (Left and median lobes x2)</b>            |                                                   |    |    |    | 0  |    |    |    |    |     |
|           | <i>Extramedullary hematopoiesis</i>                | 1                                                 | 1  | 1  | 1  |    | 1  | 1  | 1  | 1  | 1   |
|           | <i>Hepato-diaphragmatic nodule</i>                 |                                                   | 2  | 2  |    |    |    |    | 2  |    |     |
|           | <b>Spleen (TS)</b>                                 |                                                   |    |    |    |    |    |    |    |    |     |
|           | <i>Red pulp - Extramedullary hematopoiesis</i>     | 3                                                 | 3  | 3  | 3  | 3  | 3  | 3  | 3  | 3  | 3   |
|           | <i>Red pulp – single cell necrosis (apoptosis)</i> | 2                                                 | 2  | 2  | 2  | 2  | 2  | 2  | 2  | 2  | 2   |
| 3         | <b>Brain (TS x 2)</b>                              | 0                                                 | 0  | 0  | 0  | 0  | 0  | 0  | 0  | 0  | 0   |
| 4         | <b>Brain (TS x 3)</b>                              | 0                                                 | 0  | 0  | 0  | 0  | 0  | 0  | 0  | 0  | 0   |
| 5         | <b>Brain (TS x 2)</b>                              | 0                                                 | 0  | 0  | 0  | 0  | 0  | 0  | 0  | 0  | 0   |
| 6         | <b>Kidneys (Left LS x 1, Right TS x1)</b>          | 0                                                 | 0  |    | 0  |    | 0  | 0  | 0  | 0  |     |
|           | <i>Nephropathy</i>                                 |                                                   |    | 1  |    | 1  |    |    |    |    | 1   |
|           | <b>Urinary bladder</b>                             | 0                                                 | 0  | 0  | 0  | 0  | 0  | 0  | 0  | 0  | 0   |
| 7         | <b>Testes (TS x 2)</b>                             | 0                                                 | 0  | 0  | 0  | 0  | 0  | 0  | 0  | 0  | 0   |
| 8         | <b>Thymus (TS)</b>                                 | 0                                                 | 0  | 0  | 0  | 0  | 0  | 0  | 0  | 0  | 0   |
| 9         | <b>Injection Site (Tail TS x 3)</b>                |                                                   |    |    |    |    |    |    |    |    |     |
|           | <i>Perivascular - hemorrhage</i>                   | 2                                                 | 1  | 1  | 1  | 2  | 1  | 1  | 2  | 2  | 2   |
|           | <i>Perivascular - inflammation</i>                 | 1                                                 | 2  | 2  | 1  | 1  | 2  | 1  | 2  | 2  | 2   |
| 10        | <b>Aorta (TS)</b>                                  | 0                                                 | 0  | 0  | 0  | 0  | 0  | 0  | 0  | 0  | 0   |
|           | <b>Trachea (TS)</b>                                | 0                                                 | 0  | 0  | 0  | 0  | 0  | 0  | 0  | 0  | 0   |
|           | <b>Esophagus (TS)</b>                              | 0                                                 | 0  | 0  | 0  | 0  | M  | 0  | 0  | 0  | 0   |

[illegible]

**Table S20: Individual histopathological findings- Female Main Study (Group 1F)**

[illegible]









0 = No Lesion; 1 = Minimal Change; 2 = Mild Change; 3 = Moderate Change; 4 = Marked Change

**Table S26: Individual histopathological findings- 28 days Recovery phase, Group 1M and 4M**

| Block No. | Group/Animal Tissue Name                    | Vehicle (1M) |    |    |    |    | Allocetra-OTS 1260x10 <sup>6</sup> cells /kg (4M) |    |    |    |    |
|-----------|---------------------------------------------|--------------|----|----|----|----|---------------------------------------------------|----|----|----|----|
|           |                                             | 61           | 62 | 63 | 64 | 65 | 66                                                | 67 | 68 | 69 | 70 |
| 2         | Liver (Left and median lobes x2)            | 0            |    |    |    |    |                                                   |    |    | 0  |    |
|           | Extramedullary hematopoiesis                |              | 1  | 1  | 1  | 1  | 1                                                 | 1  | 1  |    | 1  |
|           | Spleen (TS)                                 |              |    |    |    |    |                                                   |    |    |    |    |
|           | Red pulp - Extramedullary hematopoiesis     | 1            | 1  | 1  | 1  | 1  | 1                                                 | 1  | 1  | 1  | 1  |
|           | Red pulp – single cell necrosis (apoptosis) |              |    |    |    |    |                                                   |    |    |    |    |

0 = No Lesion; 1 = Minimal Change; 2 = Mild Change; 3 = Moderate Change; 4 = Marked Change

**Table S27: Individual histopathological findings- 28 days Recovery phase, Group 1F and 4F**

| Block No. | Group/Animal Tissue Name                    | Vehicle (1F) |    |    |    |    | Allocetra-OTS 1260x10 <sup>6</sup> cells /kg (4F) |    |    |    |    |
|-----------|---------------------------------------------|--------------|----|----|----|----|---------------------------------------------------|----|----|----|----|
|           |                                             | 31           | 32 | 33 | 34 | 35 | 36                                                | 37 | 38 | 39 | 40 |
| 2         | Liver (Left and median lobes x2)            |              |    |    |    |    |                                                   |    |    |    |    |
|           | Extramedullary hematopoiesis                | 1            | 1  | 1  | 1  | 1  | 1                                                 | 1  | 1  | 1  | 1  |
|           | Spleen (TS)                                 |              |    |    |    |    |                                                   |    |    |    |    |
|           | Red pulp - Extramedullary hematopoiesis     | 1            | 1  | 1  | 1  | 1  | 1                                                 | 1  | 1  | 1  | 1  |
|           | Red pulp – single cell necrosis (apoptosis) |              |    |    |    |    |                                                   |    |    |    |    |

0 = No Lesion; 1 = Minimal Change; 2 = Mild Change; 3 = Moderate Change; 4 = Marked Change
